# Supplementary figures and images for: Glutaredoxin regulation of primary root growth is associated with early drought stress tolerance in pearl millet
Source: eLife journal article supplement (doi:10.7554/elife.86169), 2023-05-31

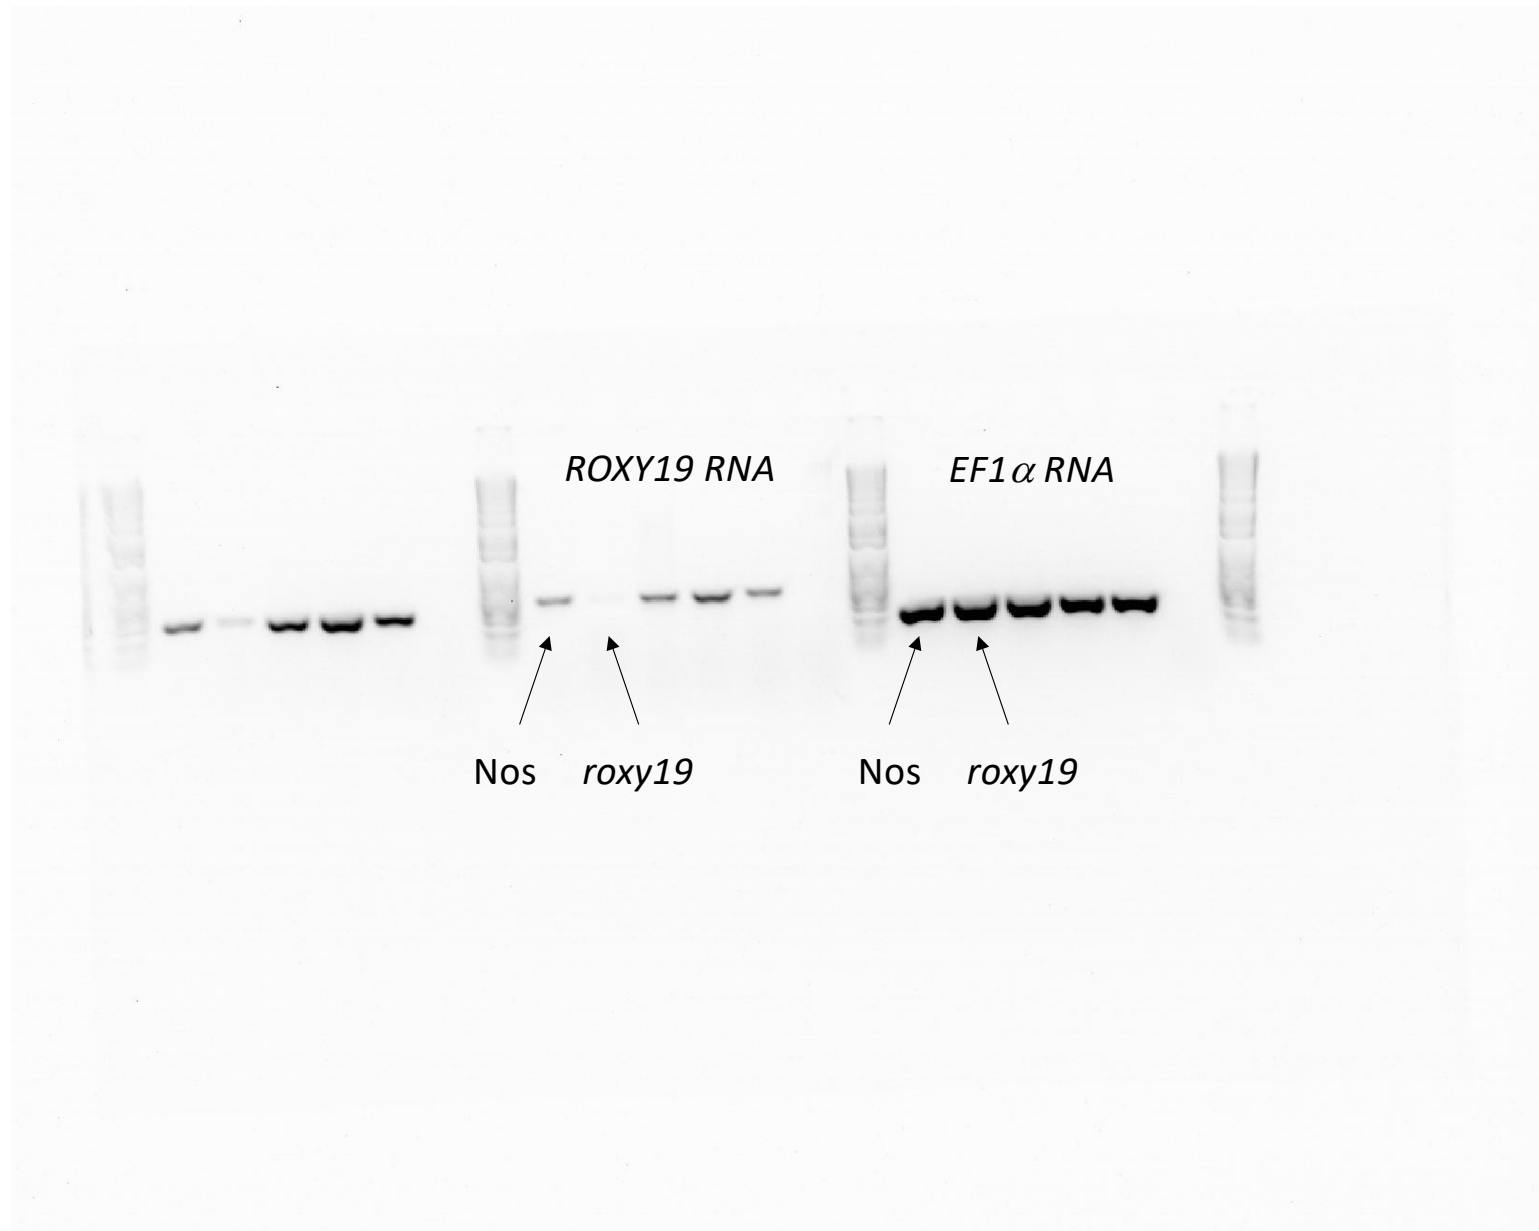

Supplement: fig4-data1 [file elife-86169-fig4-data1-v1.zip]
